# Supplementary material for: Apgar score and neonatal mortality in China: an observational study from a national surveillance system
Source: PubMed Central journal article supplement (PMC7802282; doi:10.1186/s12884-020-03533-3), 2021-01-12
Supplement: 12884_2020_3533_MOESM1_ESM.pdf [file 12884_2020_3533_MOESM1_ESM.pdf]

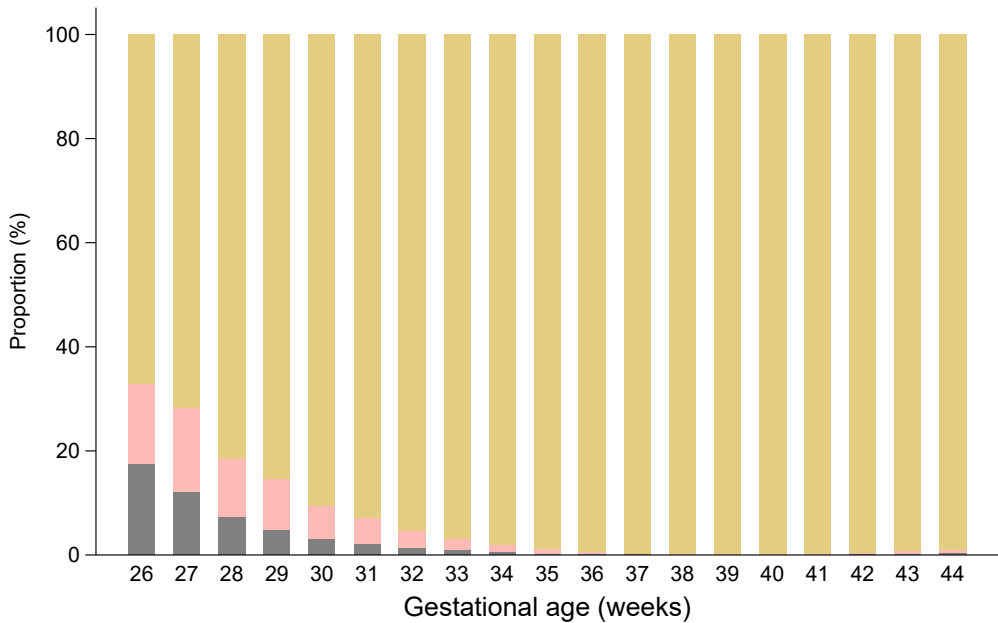

Low Apgar score (0-3)    Intermediate Apgar score (4-6)    Normal Apgar score (7-10)
